# Supplementary material for: When probabilistic seismic hazard climbs volcanoes: the Mt. Etna case, Italy – Part 2: Computational implementation and first results
Source: Copernicus journal article supplement (doi:10.5194/nhess-17-1999-2017), 2017-11-22
Supplement: Supplementary file 1 [file nhess-17-1999-2017-supplement.zip]

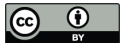

## *Supplement of*

# **When probabilistic seismic hazard climbs volcanoes: the Mt. Etna case, Italy – Part 2: Computational implementation and first results**

**Laura Peruzza et al.**

*Correspondence to:* Laura Peruzza (lperuzza@inogs.it)

- nhess-17-1999-2017-supplement-title-page.pdf
- El\_supp1\_NHESS2017-121.docx
- El\_supp2\_NHESS2017-121\_ETNAhy.atn

The copyright of individual parts of the supplement might differ from the CC BY 3.0 License.
